# Supplementary material for: Zeolite Socony Mobil-5 ordered mesoporous carbon as a fiber coating for solid-phase microextraction
Source: Royal Society of Chemistry journal article supplement (doi:10.1039/c5ay01585e), 2015-01-01
Supplement: c5ay01585e1.pdf [file c5ay01585e1.pdf]

## **Electronic Supplementary Information**

### **Zeolite Socony Mobil-5 ordered mesoporous carbon as a fiber coating for solid-phase microextraction**

Shuaihua Zhang, Qian Yang, Zhi Li, Wei Gao, Chun Wang, and Zhi Wang\*

Department of Chemistry, College of Science, Agricultural University of Hebei, Baoding 071001,  
China

\* Corresponding author: Zhi Wang

Phone: +86-312-7521513

Fax: +86-312-7521513

E-mail: wangzhi@hebau.edu.cn; zhiwang2013@aliyun.com

## **Supplement of experimental section**

### **The preparation of silver modified stainless steel wires**

First, one end (1.5 cm) of the 18 cm long stainless steel wire (o.d. 350  $\mu\text{m}$ ) was dipped in nitrohydrochloric acid ( $\text{HCl}:\text{HNO}_3 = 3:1, v/v$ ) to remove the stable oxide on its surface and corrode the end to the diameter of about 180  $\mu\text{m}$ . Then, the wire was polished smoothly and subsequently ultrasonication-washed with acetone, methanol and double-distilled water each for 6 min, respectively. After being conditioned in a desiccator at room temperature for 24 h, the wire was dipped into a reaction solution containing 0.1 mol  $\text{L}^{-1}$   $[\text{Ag}(\text{NH}_3)_2]^+$  and 0.5 mol  $\text{L}^{-1}$  glucose for about 2.5 h to form a microstructured silver layer by silver mirror reaction. Then, the wire was taken out and rinsed with distilled water. After being dried at room temperature, a firm and porous coating of silver was formed on the surface of the stainless steel wire.

## Supplement of Figure

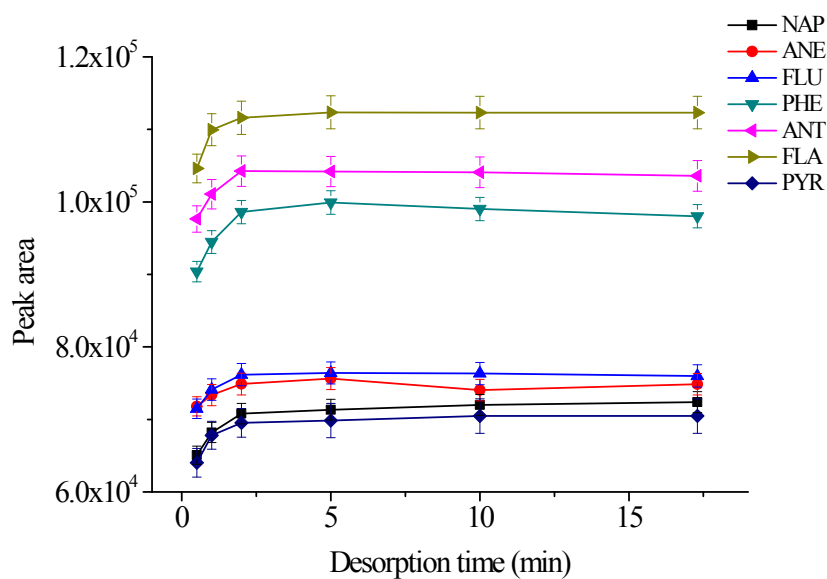

**Fig. S1** Effect of desorption time. *Conditions:* analyte concentration, 100 ng L<sup>-1</sup>; extraction temperature, 60 °C; extraction time, 30 min; stirring rate, 600 rpm; KCl concentration, 20% (w/v); desorption temperature, 250 °C.

## Supplement of Table

**Table S1** Comparison of sensitivity of different methods by various sorbents for the SPME of PAHs.

| Extraction/ determination method      | Extracting phase      | Samples         | Linear range                   | LOD                             | RSD (%)    |
|---------------------------------------|-----------------------|-----------------|--------------------------------|---------------------------------|------------|
| SPME-GC/ MS <sup>41</sup>             | PDMS                  | Water           | 0.1- 50.0 ng mL <sup>-1</sup>  | 0.01- 0.7 ng mL <sup>-1</sup>   | 3.7- 27.0  |
| Cold-fiber SPME-GC/ FID <sup>42</sup> | PDMS                  | Soil            | 1200- 40000 ng g <sup>-1</sup> | 200- 2300 ng g <sup>-1</sup>    | 4- 19      |
| SPME-GC/ MS <sup>43</sup>             | PDMS/DVB              | Coast sediments | 1.2- 500 ng g <sup>-1</sup>    | 0.4- 15 ng g <sup>-1</sup>      | 3.3-9.6    |
| SPME-GC/ FID <sup>40</sup>            | Graphene              | Water           | 0.05-200 ng mL <sup>-1</sup>   | 0.004- 0.05 ng mL <sup>-1</sup> | 2.8- 9.4   |
| SPME-GC/ FID <sup>44</sup>            | PEDOT/GO <sup>a</sup> | Water           | 0.4- 600 ng mL <sup>-1</sup>   | 0.05- 0.13 ng mL <sup>-1</sup>  | 4.1- 6.8   |
| SPME-GC/ FID <sup>45</sup>            | MWCNTs <sup>b</sup>   | smoked rice     | 0.5- 800 ng g <sup>-1</sup>    | 0.04- 0.15 ng g <sup>-1</sup>   | 1.83- 5.17 |
| SPME-GC/ FID <sup>c</sup>             | OMC-ZSM-5             | Soil            | 1.7- 100.0 ng g <sup>-1</sup>  | 0.5- 1.6 ng g <sup>-1</sup>     | 4.6- 7.9   |

<sup>a</sup> PEDOT/GO: poly(3,4-ethylenedioxythiophene)/ graphene oxide.

<sup>b</sup> MWCNTs: Multiwalled carbon nanotubes.

<sup>c</sup> present work.

## References

40. J. Fan, Z. Dong, M. Qi, R. Fu and L. Qu, *J. Chromatogr. A*, 2013, **1320**, 27-32.
41. E. Psillakis, A. Ntelekos, D. Mantzavinos, E. Nikolopoulos and N. Kalogerakis, *J. Environ. Monitor.*, 2003, **5**, 135-140.
42. E. Martendal and E. Carasek, *J Chromatogr A*, 2011, **1218**, 1707-1714.
43. V. Fernandez-Gonzalez, E. Concha-Grana, S. Muniategui-Lorenzo, P. Lopez-Mahia and D. Prada-Rodriguez, *J. Chromatogr. A*, 2008, **1196-1197**, 65-72.
44. M. H. Banitaba, S. S. Hosseiny Davarani and S. Kazemi Movahed, *J. Chromatogr. A*, 2014, **1325**, 23-30.
45. A. A. Matin, P. Biparva and M. Gheshlaghi, *J. Chromatogr. A*, 2014, **1374**, 50-57.
